# Supplementary material for: Small-Molecule Polθ Inhibitors Provide Safe and Effective Tumor Radiosensitization in Preclinical Models
Source: Clin Cancer Res. 2023 Jan 23;29(8):1631–42. doi: 10.1158/1078-0432.CCR-22-2977 (PMC10102842; doi:10.1158/1078-0432.CCR-22-2977)
Supplement: Supplementary Table S1 — Luciferase-based MMEJ assay in a panel of cancer cell lines. [file ccr-22-2977_supplementary_table_s1_suppts1.xlsx]

## Sheet: Sheet1
Cell line	IC50 (μM)				Mean Inhibition at 12μM (%)
	ART899		ART558		ART899	ART558
	Mean	SD	Mean	SD
H460	0.04211	0.007524	0.02819	0.013223	97.76	97.74
HCT116	0.09425	0.023632	0.05291	0.016539	91.54	86.87
MDA-MB-436 (BRCA1 null)	0.2256	0.038962	0.1931	0.069367	95.59	96.48
DLD-1	0.1097	0.00594	0.07284	0.020237	98.06	97.89
DLD-1 BRCA2 KO	0.1161	0.015981	0.06223	0.032364	98.98	98.62
Supplementary Table S1. Results of luciferase-based MMEJ assay in a panel of relevant cancer cell lines.
Representative of 2 biological replicates. Mean and standard deviation from 4 technical replicates are shown for the IC50 values (see Methods).
